# Supplementary material
Source: HighWire-hosted journal article supplement (http://www.qdcxjkg.com/highwire/filestream/113362/field_highwire_adjunct_files/0/supplementary_material.pdf)
Supplement: supplementary_material.pdf [file supplementary_material.pdf]

## ONLINE DATA SUPPLEMENT

### **Title:**

What does adolescent undiagnosed-wheeze represent? Findings from the Isle of Wight Cohort

### **Authors:**

\*Abid Raza , Clinical Research Fellow

\*Ramesh J Kurukulaaratchy, Consultant Respiratory Physician

Jane Grundy, Research Nurse

Bernie Clayton, Research Nurse

Frances Mitchell, Research Nurse

Graham Roberts, Professor

Susan Ewart Professor

S Hasan Arshad, Professor

\* AR& RJK contributed equally to this manuscript

## ONLINE DATA SUPPLEMENT

### Additional Details of Statistical Methods:

#### Socio-Economic Class assessment:

Standard Occupational Classification [E1] and UK National Statistics Socio-economic Classification (NS-SEC) [E2] were applied at 10 and 18-years respectively. Six categories of social class were reduced to 2 analytic groups; social classes I-III NM (High), III M-V (Low).

#### Analysis of Urinary Cotinine Data:

Continuous data on urinary cotinine was transformed into categorical form using an optimal binning method [E3] with current tobacco smoking as the optimizing variable. Three categories (low, moderate, high) were identified.

#### References:

- E1. Office of population censuses and surveys. Standard Occupational Classification 1991; Vol 1-3.
- E2. The National Statistics Socio-economic Classification Manual. 2005. p. 1-99.
- E3. Fayyad, U, Irani, K. Multi-interval discretization of continuous-value attributes for classification learning. In: *Proceedings of the Thirteenth International Joint Conference on Artificial Intelligence*. 1993. San Mateo, CA: Morgan Kaufmann.

**Table E1: Comparison of Healthcare use between Undiagnosed-wheeze and Asthma**

|                 | Undiagnosed-Wheeze | Asthma       |
|-----------------|--------------------|--------------|
| Hospital visits | 2% (1/56)          | 7% (15/226)  |
| p -value        |                    | 0.21         |
| A&E attendance  | 4% (2/56)          | 12% (26/226) |
| p -value        |                    | 0.08         |
| Missed School   | 9% (4/44)          | 18% (37/201) |
| p -value        |                    | 0.18         |

**Table E1 Notes:** Fisher Exact Test used for comparison between undiagnosed-wheeze and Asthma with significance determined at <0.05

**Table E2: Gender difference assessed for difference in BHR**

| BHR        | Overall    | Never asthma | Non-wheeze | Undiagnosed-wheeze | Asthma    |
|------------|------------|--------------|------------|--------------------|-----------|
| 10 year    |            |              |            |                    |           |
| Male (n)   | 1.48 (362) | 1.32 (206)   | 1.36 (266) | 1.38 (17)          | 1.94 (79) |
| Female (n) | 1.45 (361) | 1.33 (212)   | 1.36 (248) | 1.38 (21)          | 1.73 (92) |
| p-value    | 0.40       | 0.75         | 0.96       | 0.94               | 0.03      |
| 18 year    |            |              |            |                    |           |
| Male (n)   | 1.12 (292) | 1.05 (181)   | 1.05 (222) | 1.13 (13)          | 1.36 (57) |
| Female(n)  | 1.14 (293) | 1.08 (197)   | 1.08 (225) | 1.03 (12)          | 1.37 (56) |
| p-value    | 0.41       | 0.27         | 0.16       | 0.40               | 0.85      |

**Table E2 Notes:**

Independent samples t-test was applied with significance determined at  $p < 0.05$

(n) represents number of participants in each group

Table E3: Cross-sectional lung function, height and BHR analysis at 10 and 18-yrs for wheeze phenotypes

| 10 Year              | Lung Function/BHR                 | B       | 95% CI          | p-value |
|----------------------|-----------------------------------|---------|-----------------|---------|
| Asthma*              | FEV1                              | - 0.04  | -0.10 - 0.02    | 0.15    |
|                      | FVC                               | 0.03    | -0.03 - 0.09    | 0.34    |
|                      | FEV1/FVC                          | - 0.03  | -0.04- (-0.02)  | <0.001  |
|                      | FEF25-75%                         | - 0.27  | -0.40 - (-0.13) | <0.001  |
|                      | DRS <sup>§</sup>                  | 0.48    | 0.38 - 0.58     | <0.001  |
| Undiagnosed Wheeze * | FEV1                              | - 0.06  | -0.15 - 0.04    | 0.24    |
|                      | FVC                               | - 0.05  | -0.14 - 0.05    | 0.35    |
|                      | FEV1/FVC                          | - 0.004 | -0.03 - 0.02    | 0.74    |
|                      | FEF25-75%                         | - 0.004 | -0.22 - 0.22    | 0.98    |
|                      | DRS <sup>§</sup>                  | 0.05    | - 0.16 - 0.26   | 0.66    |
| 18 year              |                                   |         |                 |         |
| Asthma*              | FEV1                              | - 0.25  | -0.37 - (-0.13) | <0.001  |
|                      | FVC                               | - 0.09  | -0.23-0.05      | 0.20    |
|                      | FEV1/FVC                          | - 0.05  | -0.06 - (-0.03) | <0.001  |
|                      | FEF25-75%                         | - 0.58  | -0.83 - (-0.34) | <0.001  |
|                      | DRS <sup>§</sup>                  | 0.30    | 0.24 - 0.36     | <0.001  |
|                      | %FEV <sub>1</sub> Reversibility** | 4.35    | 3.36 - 5.32     | <0.001  |
| Undiagnosed Wheeze*  | FEV1                              | - 0.25  | -0.45 - (-0.04) | 0.03    |
|                      | FVC                               | - 0.30  | -0.53- (-0.06)  | 0.02    |
|                      | FEV1/FVC                          | 0.004   | -0.03 - 0.03    | 0.80    |
|                      | FEF25-75%                         | - 0.19  | -0.60 - 0.22    | 0.36    |

|                             |        |              |      |
|-----------------------------|--------|--------------|------|
| DRS <sup>§</sup>            | - 0.03 | -0.16 – 0.09 | 0.61 |
| %FEV <sub>1</sub>           | 0.004  | -1.67 – 1.68 | 1.00 |
| Reversibility <sup>**</sup> |        |              |      |

Table E3 Notes:

Comparison between groups was performed using repeated measures General Linear Models (GLM) adjusted for height and sex with significance at  $p < 0.05$ .

Number of participants per group Non-wheeze = 521, UDW = 39, Asthma = 139

\* Group comparisons of undiagnosed-wheeze and asthma against reference of non-wheeze.

§ BHR DRS: refers to a continuous dose-response (DRS) measure of bronchial hyper-responsiveness (BHR) expressed as  $\text{Log}_{10}(\text{DRS} + 10)$ ; higher values infer greater BHR.

Number of participants for BHR: Non-wheeze = 592, UDW = 45, Asthma = 153

\*\* %FEV<sub>1</sub> reversibility: to 600 micrograms inhaled salbutamol. GLM univariate model applied with significance at  $p < 0.05$  for this variable.

**Table E4: Univariate analysis of risk factors for undiagnosed-wheeze from birth to 18 years**

|                                                              | Undiagnosed-wheeze %<br>(n/total) | Non-Wheeze<br>% (n/total) | OR   | 95% Confidence Interval | p - value |
|--------------------------------------------------------------|-----------------------------------|---------------------------|------|-------------------------|-----------|
| Maternal smoking during pregnancy                            | 34 (22/64)                        | 24 (235/994)              | 1.69 | 0.99 - 2.89             | 0.06      |
| Home tobacco smoke exposure during pregnancy *               | 58 (37/64)                        | 45 (447/999)              | 1.69 | 1.02 - 2.82             | 0.04      |
| Smoke exposure at 1                                          | 40 (22/55)                        | 40 (372/934)              | 1.00 | 0.58 - 1.76             | 0.98      |
| Smoke exposure at 2                                          | 40 (19/47)                        | 40 (342/840)              | 0.99 | 1.00 - 1.80             | 0.97      |
| Smoke exposure at 4                                          | 39 (20/51)                        | 42 (81/192)               | 1.00 | 0.56 - 1.78             | 0.99      |
| Smoke exposure at 10                                         | 49 (23/47)                        | 48 (93/194)               | 1.26 | 0.70- 2.26              | 0.45      |
| Home tobacco smoke exposure at 18-years (active and passive) | 61 (39/64)                        | 41 (414/1008)             | 2.24 | 1.33 - 3.76             | 0.002     |
| Current and past self-smoke exposure 18-years†               | 73 (47/64)                        | 45 (437/977)              | 3.42 | 1.93 - 6.03             | <0.001    |
| Chest infection at 1 year                                    | 9 (5/54)                          | 7 (62/926)                | 1.42 | 0.55 - 3.70             | 0.47      |
| Chest infection at 2year                                     | 15 (7/47)                         | 12 (99/838)               | 1.31 | 0.57 - 3.00             | 0.53      |
| Lower social class at pregnancy‡                             | 55 (23/42)                        | 54 (321/593)              | 0.98 | 0.52 - 1.83             | 0.94      |
| Lower social class at 10 ‡                                   | 58 (29/50)                        | 50 (428/864)              | 1.41 | 0.79 - 2.51             | 0.25      |
| Lower social class at 18 ‡                                   | 42 (22/53)                        | 32 (292/909)              | 1.50 | 0.85 - 2.64             | 0.16      |
| Pet cat 0                                                    | 30 (19/64)                        | 34 (339/1002)             | 0.83 | 0.48 - 1.43             | 0.50      |
| Pet cat 1                                                    | 24 (13/54)                        | 31 (292/938)              | 0.70 | 0.37 - 1.33             | 0.28      |
| Pet cat 2                                                    | 76 (35/46)                        | 80 (678/848)              | 0.80 | 0.40 - 1.60             | 0.53      |
| Pet cat 4                                                    | 35 (18/52)                        | 37 (315/864)              | 0.92 | 0.51- 1.66              | 0.79      |
| Pet cat 10                                                   | 41 (24/58)                        | 44 (424/959)              | 0.89 | 0.52 - 1.53             | 0.67      |
| Pet cat 18                                                   | 41 (26/64)                        | 42 (421/999)              | 0.94 | 0.56 - 1.57             | 0.81      |
| Pet dog 0                                                    | 33 (21/64)                        | 28 (285/1002)             | 1.23 | 0.72 - 2.11             | 0.45      |
| Pet dog 1                                                    | 28 (15/54)                        | 26 (248/938)              | 1.07 | 0.58 - 1.98             | 0.83      |
| Pet dog 2                                                    | 24 (11/46)                        | 17 (146/848)              | 1.51 | 0.75 - 3.05             | 0.25      |
| Pet dog 4                                                    | 29 (15/52)                        | 28 (239/864)              | 1.06 | 0.57 - 1.97             | 0.85      |
| Pet dog 10                                                   | 45 (26/58)                        | 38 (361/959)              | 1.35 | 0.79 - 2.30             | 0.28      |
| Pet dog 18                                                   | 56 (36/64)                        | 48 (477/997)              | 1.40 | 0.84 - 2.33             | 0.19      |
| Rhinitis at 1                                                | 13 (7/55)                         | 9 (81/938)                | 1.54 | 0.68 - 3.52             | 0.30      |
| Rhinitis at 2                                                | 6 (3/49)                          | 10 (83/853)               | 0.61 | 0.18 - 1.99             | 0.41      |
| Rhinitis at 4                                                | 10 (5/51)                         | 4 (34/861)                | 2.64 | 0.99 - 7.08             | 0.05      |
| Rhinitis at 10                                               | 17 (10/58)                        | 18 (171/955)              | 0.96 | 0.47 - 1.93             | 0.90      |
| Rhinitis at 18                                               | 53 (34/64)                        | 28 (278/1006)             | 2.97 | 1.78 - 4.94             | <0.001    |
| wheeze at 1                                                  | 14 (7/51)                         | 11 (101/917)              | 1.52 | 0.56 - 2.93             | 0.55      |
| wheeze at 2                                                  | 18 (9/49)                         | 14 (114/843)              | 1.44 | 0.68 - 3.05             | 0.34      |
| wheeze at 4                                                  | 14 (7/51)                         | 10 (89/862)               | 1.38 | 0.55 - 3.32             | 0.44      |
| wheeze at 10                                                 | 5 (3/58)                          | 10 (95/960)               | 0.50 | 0.12 - 1.69             | 0.24      |
| Atopy at 4-years§                                            | 25 (10/40)                        | 14 (99/703)               | 2.03 | 0.96- 4.29              | 0.06      |
| Atopy at 10-years§                                           | 23 (11/47)                        | 20 (145/731)              | 1.17 | 0.61 - 2.49             | 0.55      |
| Atopy at 18-years§                                           | 38 (17/45)                        | 34 (221/643)              | 1.16 | 0.62 - 2.16             | 0.64      |

**Table E4 Notes:**

Comparisons between undiagnosed-wheeze and non-wheeze groups were made using logistic regression for single variables. Odds ratios represent probability of demonstrating undiagnosed- wheeze in relation to non-wheezers.

\*Tobacco smoke exposure inside the house by either parents or any other family member.

† Past or current tobacco smoking status determined at age 18

‡Low social class is based on Social Occupation Classification categories (IIIM to V)

§ Atopy defined by at least 1 skin test wheal response  $\geq 3$ mm diameter



**Table E5: Univariate Analysis of Risk Factors for Undiagnosed-Wheeze at Single Time Point**

| Adolescent factors             | Undiagnosed-wheeze (n/total) | Non-Wheeze (n/total) | OR   | 95% Confidence Interval | p - value |
|--------------------------------|------------------------------|----------------------|------|-------------------------|-----------|
| Family history of asthma *     | 61 (36/59)                   | 43 (419/966)         | 2.04 | 1.19 - 3.50             | 0.009     |
| Breast feed > 3 months         | 43 (23/53)                   | 47 (434/919)         | 0.86 | 0.49 - 1.50             | 0.59      |
| Paracetamol use per month†     | 1.0 (0,3) (63)               | 1.0 (0,2) (983)      | 1.13 | 1.06 - 1.20             | <0.001    |
| NSAID use per month‡           | 0 (0,1.5) (63)               | 0 (0,1) (983)        | 1.07 | 1.00 - 1.14             | 0.056     |
| Number of days exercise at 18‡ | 3.21 (53)                    | 3.08 (746)           | 0.94 | 0.84 - 1.04             | 0.22      |

**Table E5 Notes:**

Comparisons between undiagnosed-wheeze and non-wheeze groups were made using logistic regression for single variables. Odds ratios represent probability of demonstrating undiagnosed-wheeze in relation to non-wheezers.

\*Parental or sibling history of asthma recorded at birth

† Median (25th, 75th) percentile reported, represents number of times paracetamol or NSAID use/month

‡Geometric mean of the number of days of vigorously exercise per week is done

**Table E6: Univariate Analysis of Risk Factors for Asthma from birth to 18 years**

|                                                              | Asthmatic Wheeze % (n/total) | Non-Wheeze % (n/total) | OR    | 95% Confidence Interval | p- value |
|--------------------------------------------------------------|------------------------------|------------------------|-------|-------------------------|----------|
| <b>Early life factors</b>                                    |                              |                        |       |                         |          |
| Maternal smoking during pregnancy                            | 22 (51/233)                  | 24 (235/994)           | 0.91  | 0.64 - 1.28             | 0.57     |
| Home tobacco smoke exposure during pregnancy                 | 46 (106/232)                 | 45 (447/999)           | 1.04  | 0.78 -1.38              | 0.79     |
| Smoke exposure at 1                                          | 47 (97/208)                  | 40 (372/934)           | 1.32  | 0.98 - 1.79             | 0.07     |
| Smoke exposure at 2                                          | 44 (81/185)                  | 41 (342/840)           | 1.13  | 0.82 - 1.56             | 0.44     |
| Smoke exposure at 4                                          | 42 (81/192)                  | 39 (339/863)           | 1.13  | 0.82 - 1.55             | 0.46     |
| Smoke exposure at 10                                         | 48 (93/194)                  | 43 (372/859)           | 1.21  | 0.88 - 1.65             | 0.24     |
| Home tobacco smoke exposure at 18-years (active and passive) | 45 (105/234)                 | 41 (414/1008)          | 1.17  | 0.88 - 1.56             | 0.29     |
| Current or past self-smoke exposure †                        | 54 (120/224)                 | 45 (437/977)           | 1.43  | 1.07 - 1.91             | 0.017    |
| Chest infection at 1 year                                    | 9 (19/209)                   | 7 (62/926)             | 1.39  | 0.81 - 2.39             | 0.23     |
| Chest infection at 2year                                     | 18 (34/189)                  | 12 (99/838)            | 1.64  | 1.07 - 2.51             | 0.02     |
| Lower Social Class during pregnancy‡                         | 53 (74/141)                  | 54 (321/593)           | 1.07  | 0.74 - 1.54             | 0.73     |
| Lower social class at 10 ‡                                   | 51 (98/193)                  | 50 (428/864)           | 1.05  | 0.77 - 1.44             | 0.76     |
| Lower social class at 18 ‡                                   | 35 (74/212)                  | 32 (292/909)           | 1.13  | 0.83 - 1.55             | 0.44     |
| Pet cat 0                                                    | 31 (71/233)                  | 34 (339/1002)          | 0.86  | 0.63 - 1.17             | 0.33     |
| Pet cat 1                                                    | 28 (58/210)                  | 31 (292/938)           | 0.84  | 0.61 - 1.18             | 0.32     |
| Pet cat 2                                                    | 80 (151/188)                 | 80 (678/848)           | 1.02  | 0.69 - 1.52             | 0.91     |
| Pet cat 4                                                    | 38 (74/194)                  | 37 (315/864)           | 1.08  | 0.78 - 1.48             | 0.66     |
| Pet cat 10                                                   | 49 (108/220)                 | 44 (424/959)           | 1.22  | 0.91 - 1.63             | 0.19     |
| Pet cat 18                                                   | 50 (115/232)                 | 42 (421/999)           | 1.35  | 1.01 - 1.80             | 0.04     |
| Pet dog 0                                                    | 29 (68/233)                  | 28 (285/1002)          | 1.04  | 0.76 - 1.42             | 0.82     |
| Pet dog 1                                                    | 26 (55/210)                  | 26 (248/938)           | 0.99  | 0.70 - 1.39             | 0.94     |
| Pet dog 2                                                    | 15 (28/188)                  | 17 (146/848)           | 0.84  | 0.54 - 1.31             | 0.44     |
| Pet dog 4                                                    | 29 (56/194)                  | 28 (239/864)           | 1.06  | 0.75 - 1.50             | 0.74     |
| Pet dog 10                                                   | 41 (90/220)                  | 38 (361/959)           | 1.15  | 0.85 - 1.55             | 0.37     |
| Pet dog 18                                                   | 50 (117/233)                 | 48 (477/997)           | 1.10  | 0.83 - 1.46             | 0.51     |
| Rhinitis at 1                                                | 10 (22/211)                  | 9 (81/938)             | 1.23  | 0.75 - 2.02             | 0.41     |
| Rhinitis at 2                                                | 12 (22/191)                  | 10 (83/853)            | 1.21  | 0.73 - 1.99             | 0.46     |
| Rhinitis at 4                                                | 11 (20/191)                  | 4 (34/861)             | 2.85  | 1.60 - 5.10             | <0.001   |
| Rhinitis at 10                                               | 46 (100/216)                 | 18 (171/955)           | 3.95  | 2.89 - 5.41             | <0.001   |
| Rhinitis at 18                                               | 66 (154/233)                 | 28 (278/1006)          | 5.11  | 3.77 - 6.92             | <0.001   |
| Wheeze at 1                                                  | 16 (33/206)                  | 11 (101/917)           | 1.54  | 1.01 - 2.36             | 0.047    |
| Wheeze at 2                                                  | 24 (45/186)                  | 14 (114/843)           | 2.04  | 1.38 - 3.01             | <0.001   |
| Wheeze at 4                                                  | 40 (72/190)                  | 10 (89/862)            | 5.30  | 3.62 - 7.77             | <0.001   |
| Wheeze at10                                                  | 61 (134/220)                 | 10 (95/960)            | 14.19 | 9.92 - 20.32            | <0.001   |
| Atopy at 4-years§                                            | 43 (68/159)                  | 14 (99/703)            | 4.56  | 3.12 - 6.66             | <0.001   |
| Atopy at 10-years§                                           | 57 (104/184)                 | 20 (145/731)           | 5.25  | 3.73 - 7.41             | <0.001   |
| Atopy at 18-years§                                           | 69 (114/165)                 | 34 (221/643)           | 4.27  | 2.95 - 6.17             | <0.001   |

---

**Table E6 Notes:**

Comparisons between asthmatic-wheeze and non-wheeze groups were made using logistic regression for single variables. Odds ratios represent probability of demonstrating undiagnosed- wheeze in relation to non-wheezers.

\*Tobacco smoke exposure inside the house by either parents or any other family member.

† Past or current tobacco smoking status determined at age 18

‡Low social class is based on Social Occupation Classification categories (IIIM to V)

§ Atopy defined by at least 1 skin test wheal response  $\geq 3$ mm diameter

**Table E7: Univariate Analysis of Risk Factors for Asthmatic-Wheeze at Single Time Point**

| <b>Adolescent factors</b>                       | <b>Asthmatic Wheeze % (n/total)</b> | <b>Non-Wheeze % (n/total)</b> | <b>OR</b> | <b>95% Confidence Interval</b> | <b>p- value</b> |
|-------------------------------------------------|-------------------------------------|-------------------------------|-----------|--------------------------------|-----------------|
| Family History of Asthma *                      | 62 (139/226)                        | 43 (419/966)                  | 2.01      | 1.55 - 2.81                    | <0.001          |
| Breast feed > 3 months                          | 44 (91/209)                         | 47 (434/919)                  | 0.86      | 0.64 - 1.17                    | 0.34            |
| Paracetamol use per month <sup>†</sup>          | 1.0 (0,3) (223)                     | 1.0 (0,2) (983)               | 1.12      | 1.06 - 1.17                    | <0.001          |
| NSAID use per month <sup>†</sup>                | 0 (0,1) (223)                       | 0 (0,1) (983)                 | 1.02      | 0.97 - 1.08                    | 0.42            |
| Number of days exercise/week at 18 <sup>‡</sup> | 2.7 (175)                           | 3.08 (746)                    | 0.90      | 0.80 - 1.01                    | 0.07            |

**Table E7 Notes:**

Comparisons between asthmatic-wheeze and non-wheeze groups were made using logistic regression for single variables. Odds ratios represent probability of demonstrating asthmatic wheeze in relation to non-wheezers.

\*Family history of asthma, determined at birth from parents

<sup>†</sup> Median (25th, 75th) percentile reported, represents number of times paracetamol or NSAID use/month

<sup>‡</sup>Geometric mean of the number of days of vigorously exercise per week

**Table E8: Multivariate Analysis of Factors Associated with Undiagnosed-wheeze and Asthma at 18-yrs (when excluding earlier diagnosis of asthma in the reference “non-wheeze” group)**

| Risk Factor                        | Odds ratio | 95% Confidence Interval | p - value |
|------------------------------------|------------|-------------------------|-----------|
| <b>Undiagnosed-Wheeze:</b>         |            |                         |           |
| Rhinitis at 18 years               | 2.66       | 1.30 – 5.44             | 0.007     |
| Teenage smoking (past or current)* | 2.57       | 1.20 – 5.48             | 0.015     |
| Paracetamol use at 18 years†       | 1.10       | 1.00 – 1.21             | 0.049     |
| Family history of asthma‡          | 2.38       | 1.15 – 4.91             | 0.019     |
| <b>Asthma:</b>                     |            |                         |           |
| Family History of Asthma‡          | 1.71       | 1.10 – 2.67             | 0.018     |
| Atopy at 4 year §                  | 5.18       | 3.20 – 8.38             | <0.001    |
| Rhinitis at 10 years               | 4.66       | 2.96 – 7.34             | <0.001    |
| Paracetamol use at 18 years†       | 1.08       | 1.01 – 1.16             | 0.019     |
| Early life asthma at 1 or 2        | 2.09       | 1.04 – 4.21             | 0.04      |

**Table E8 Notes:** Factors for undiagnosed-wheeze and asthma showing trends for significance at univariate analysis ( $p < 0.1$ ) against non-wheezers (where non-wheezers with past asthma were excluded) were entered en-bloc into separate logistic regression models to identify independent risk factors for each group. Factors entered for undiagnosed-wheeze included female gender, family history of asthma, home tobacco exposure during pregnancy, atopy at 4-years, teenage smoking, paracetamol use at 18-years, NSAID use at 18-years, and rhinitis at 18-years.
